# Supplementary material for: Synthesis, Characterization, and Investigation of Anti-Inflammatory and Cytotoxic Activities of Novel Thiourea Derivatives of Naproxen
Source: MDPI journal article supplement (doi:10.3390/pharmaceutics16010001), 2023-12-19
Supplement: s1 [file s1]

## PHARMACEUTICS

Supplementary Information associated with the paper

### **Synthesis, Characterization, and Investigation of Anti-Inflammatory and Cytotoxic Activities of Novel Thiourea Derivatives of Naproxen**

Nikola Nedeljković <sup>1</sup>, Miloš Nikolić <sup>1,\*</sup>, Petar Čanović <sup>2,\*</sup>, Milan Zarić <sup>2</sup>, Radica Živković Zarić <sup>3</sup>, Jelena Bošković <sup>4</sup>, Marina Vesović <sup>1</sup>, Jovana Bradić <sup>1,5</sup>, Marijana Anđić <sup>1,5</sup>, Aleksandar Kočović <sup>1,5</sup>, Marina Nikolić <sup>5,6</sup>, Vladimir Jakovljević <sup>5,6,7</sup>, Zorica Vujić <sup>4</sup>, Vladimir Dobričić <sup>4</sup>

<sup>1</sup> Department of Pharmacy, Faculty of Medical Sciences, University of Kragujevac, Svetozara Markovica 69, 34000 Kragujevac, Serbia

<sup>2</sup> Department of Biochemistry, Faculty of Medical Sciences, University of Kragujevac, Svetozara Markovica 69, 34000 Kragujevac, Serbia

<sup>3</sup> Department of Pharmacology and Toxicology, Faculty of Medical Sciences, University of Kragujevac, Svetozara Markovića 69, 34000 Kragujevac, Serbia

<sup>4</sup> Department of Pharmaceutical Chemistry, Faculty of Pharmacy, University of Belgrade, Vojvode Stepe 450, 11221 Belgrade, Serbia

<sup>5</sup> Center of Excellence for Redox Balance Research in Cardiovascular and Metabolic Disorders, Svetozara Markovica 69, 34000 Kragujevac, Serbia

<sup>6</sup> Department of Physiology, Faculty of Medical Sciences, University of Kragujevac, Svetozara Markovica 69, 34000 Kragujevac, Serbia

<sup>7</sup> Department of Human Pathology, First Moscow State Medical University IM Sechenov, 119435 Moscow, Russia

\* Correspondence: milos.nikolic@medf.kg.ac.rs (M.N.); petar.canovic@medf.kg.ac.rs (P.Č.)

## Contents

### 1. NMR spectra of compounds 1-7.

|                                                                                    |   |
|------------------------------------------------------------------------------------|---|
| <sup>1</sup> H NMR spectrum (a) and <sup>13</sup> C NMR (b) of compound 8 (MN19).  | 3 |
| <sup>1</sup> H NMR spectrum (a) and <sup>13</sup> C NMR (b) of compound 9 (MN21).  | 4 |
| <sup>1</sup> H NMR spectrum (a) and <sup>13</sup> C NMR (b) of compound 10 (MN22). | 5 |
| <sup>1</sup> H NMR spectrum (a) and <sup>13</sup> C NMR (b) of compound 11 (MN23). | 6 |
| <sup>1</sup> H NMR spectrum (a) and <sup>13</sup> C NMR (b) of compound 12 (MN27). | 7 |
| <sup>1</sup> H NMR spectrum (a) and <sup>13</sup> C NMR (b) of compound 13 (MN28). | 8 |
| <sup>1</sup> H NMR spectrum (a) and <sup>13</sup> C NMR (b) of compound 14 (MN25). | 9 |

a)

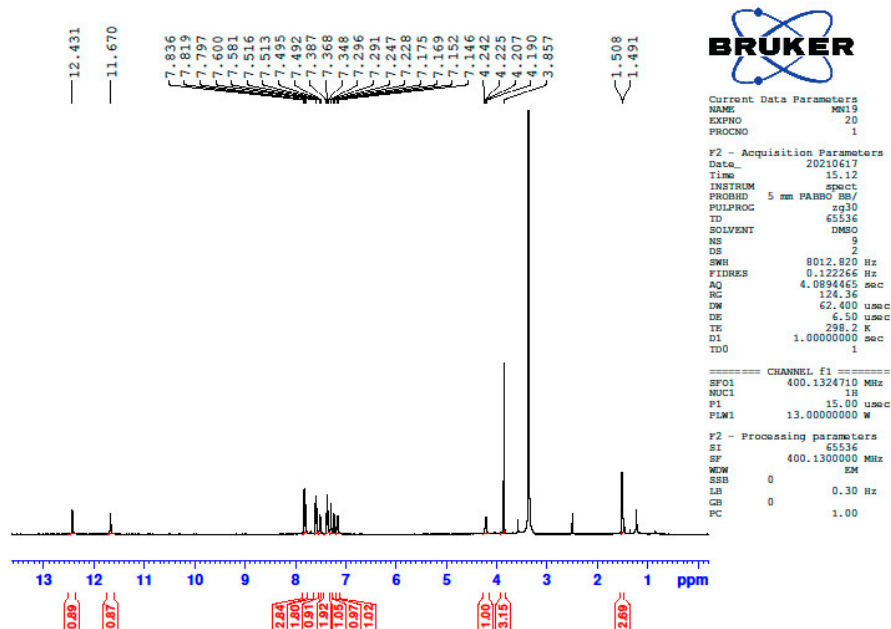

b)

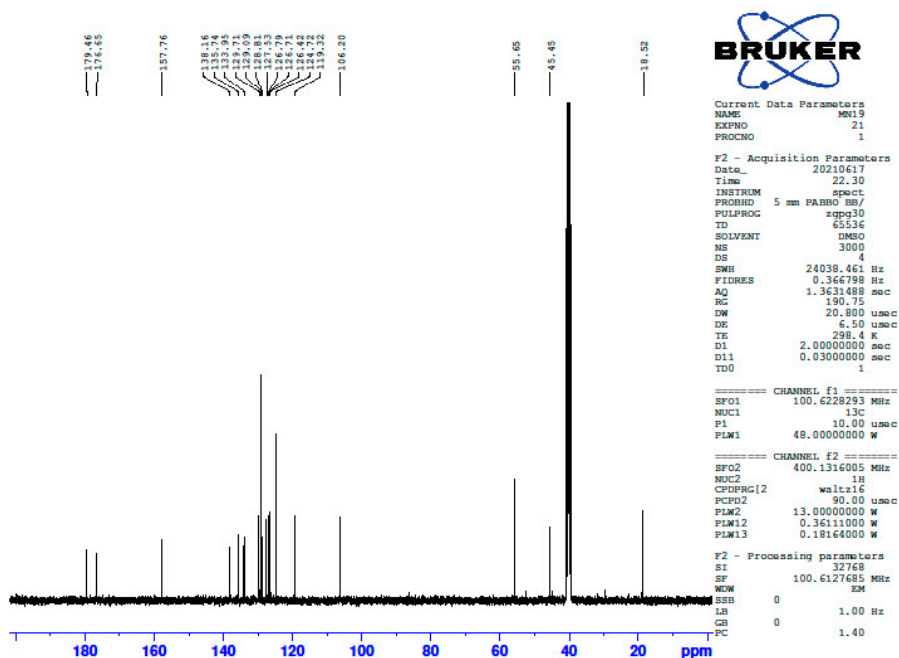

Figure S1.  $^1\text{H}$  NMR spectrum (a) and  $^{13}\text{C}$  NMR (b) of compound 8 (MN19).

a)

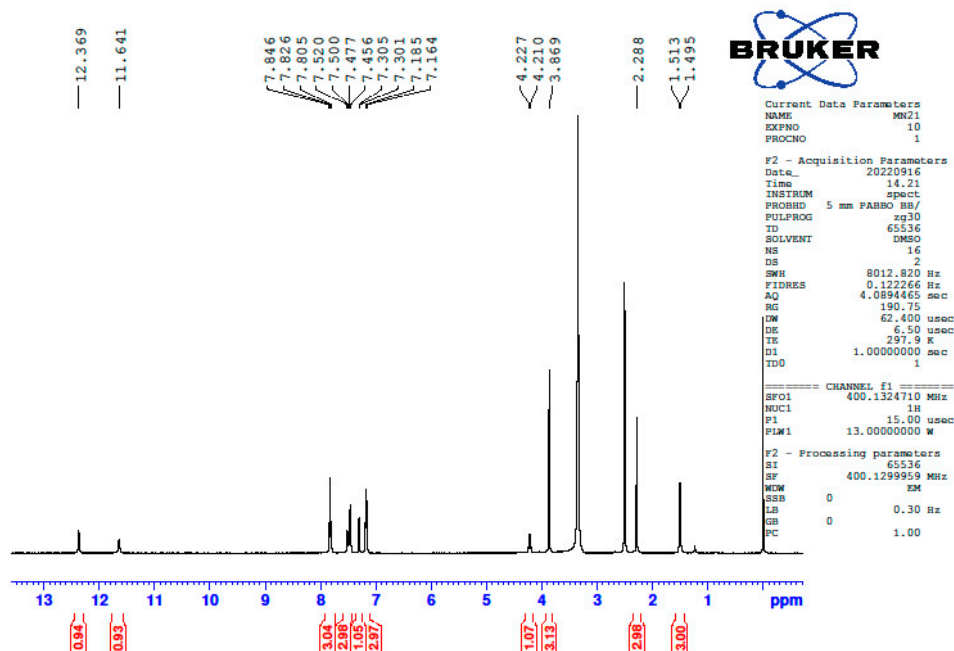

b)

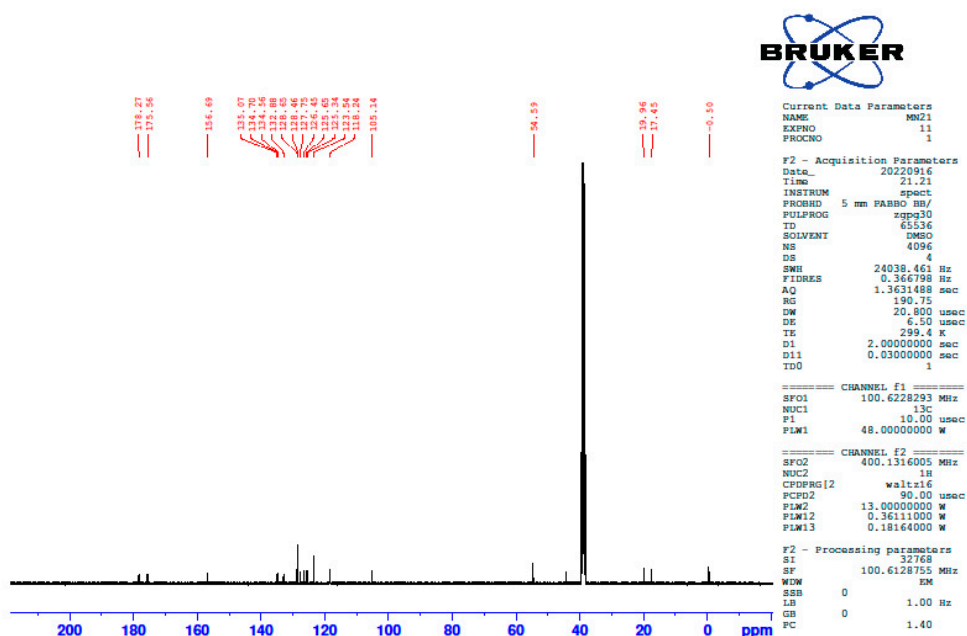

Figure S2.  $^1\text{H}$  NMR spectrum (a) and  $^{13}\text{C}$  NMR (b) of compound **9** (MN21).

a)

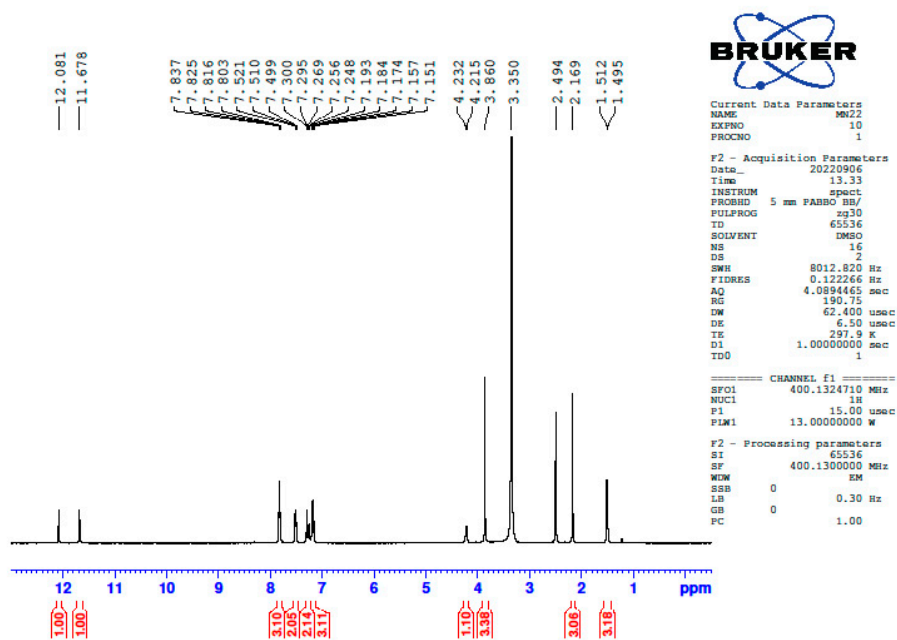

b)

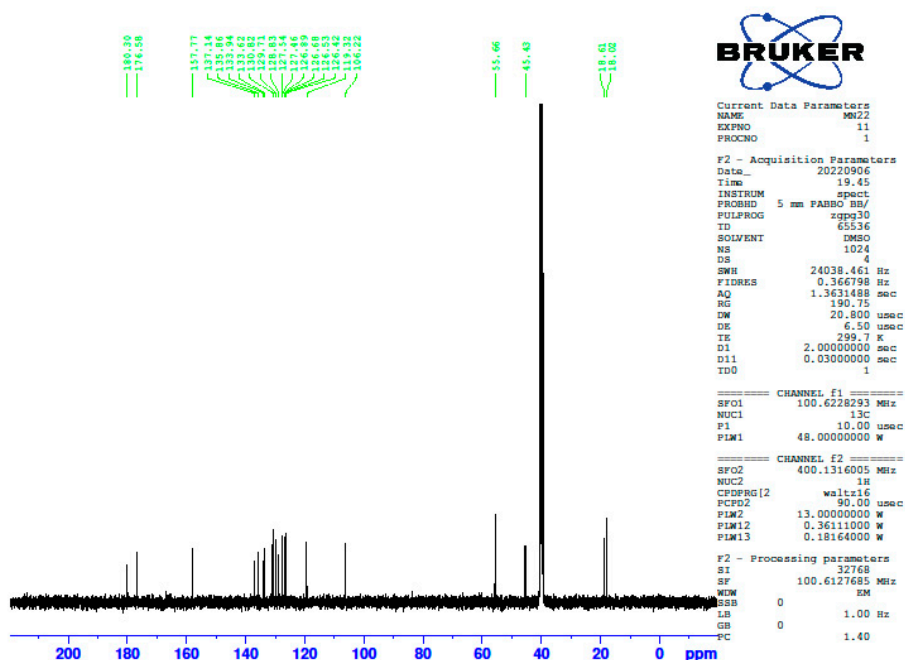

Figure S3. <sup>1</sup>H NMR spectrum (a) and <sup>13</sup>C NMR (b) of compound 10 (MN22).

a)

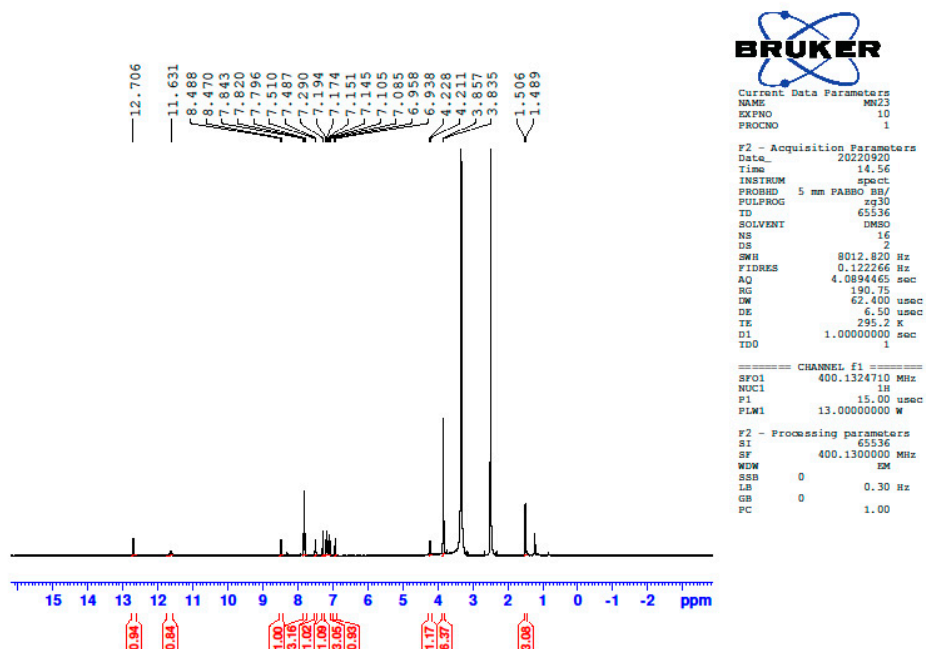

b)

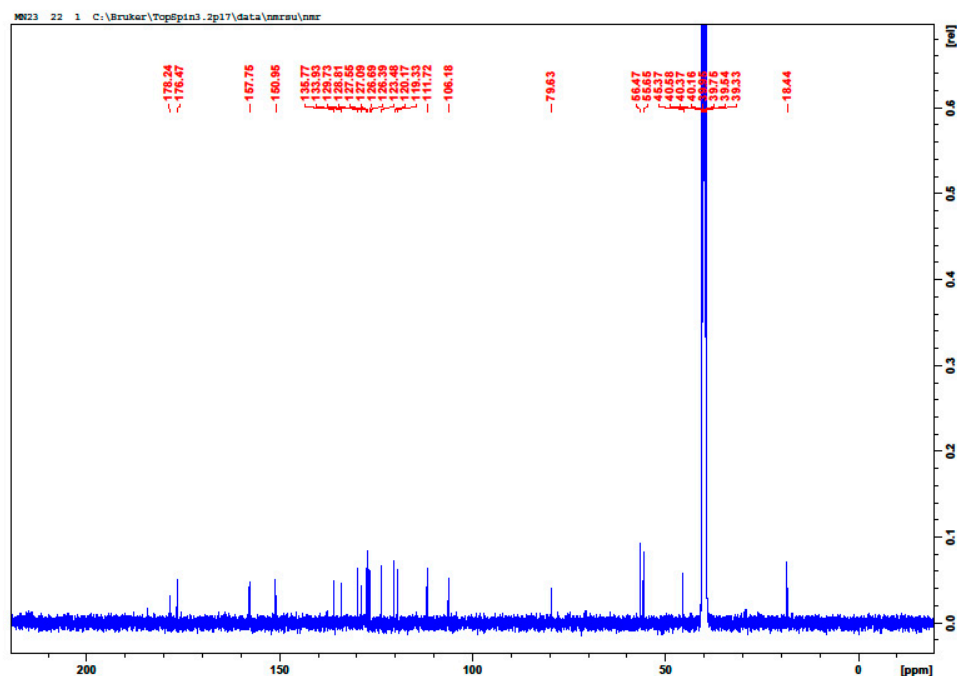

Figure S4.  $^1\text{H}$  NMR spectrum (a) and  $^{13}\text{C}$  NMR (b) of compound **11** (MN23).

a)

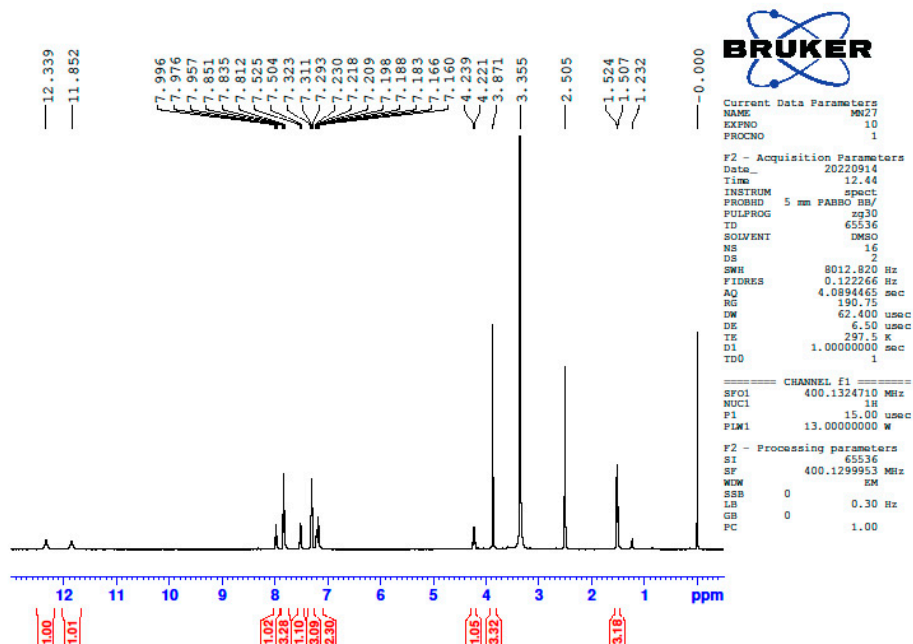

b)

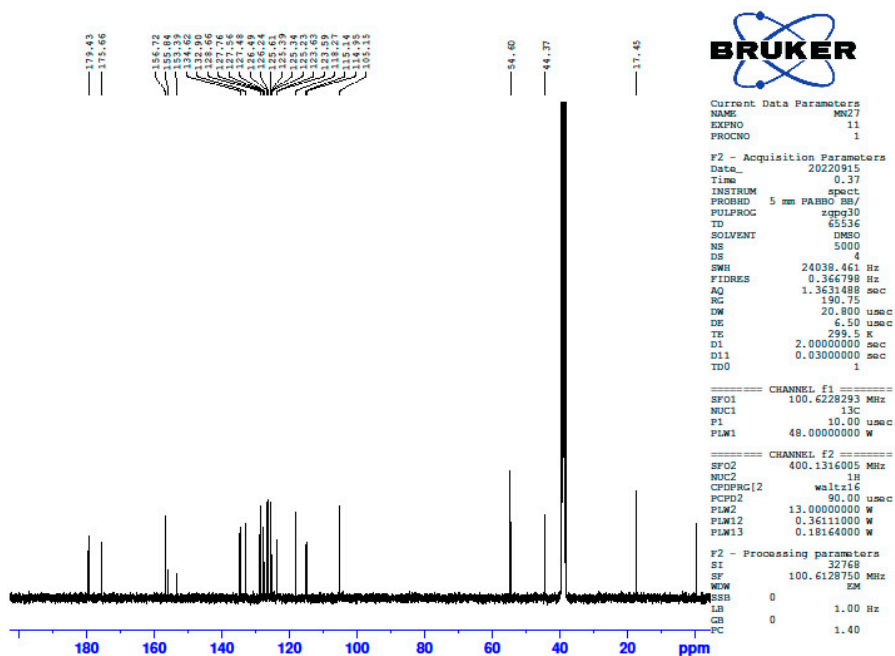

Figure S5.  $^1\text{H}$  NMR spectrum (a) and  $^{13}\text{C}$  NMR (b) of compound 12 (MN27).

a)

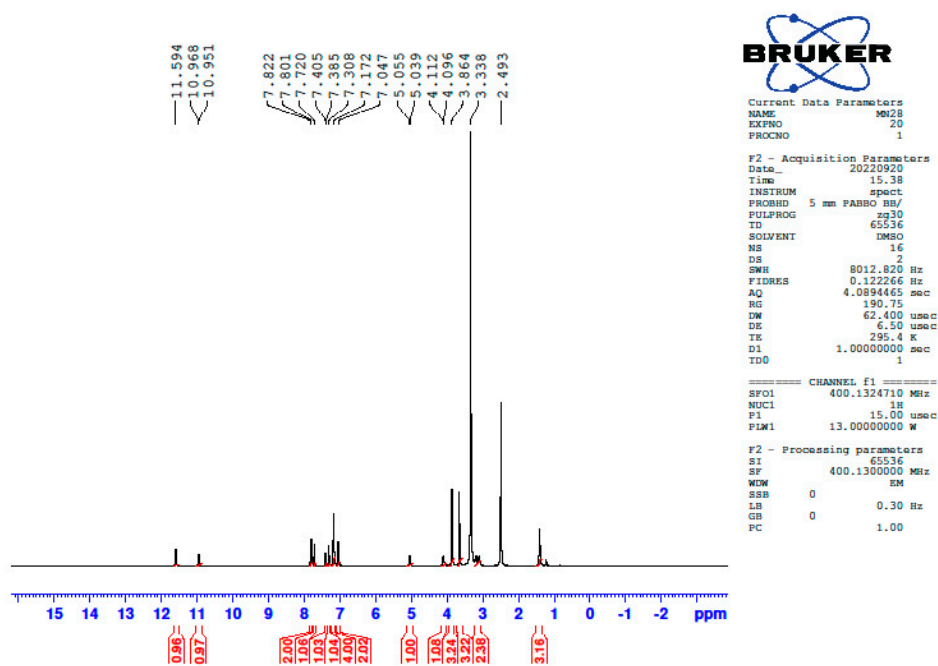

b)

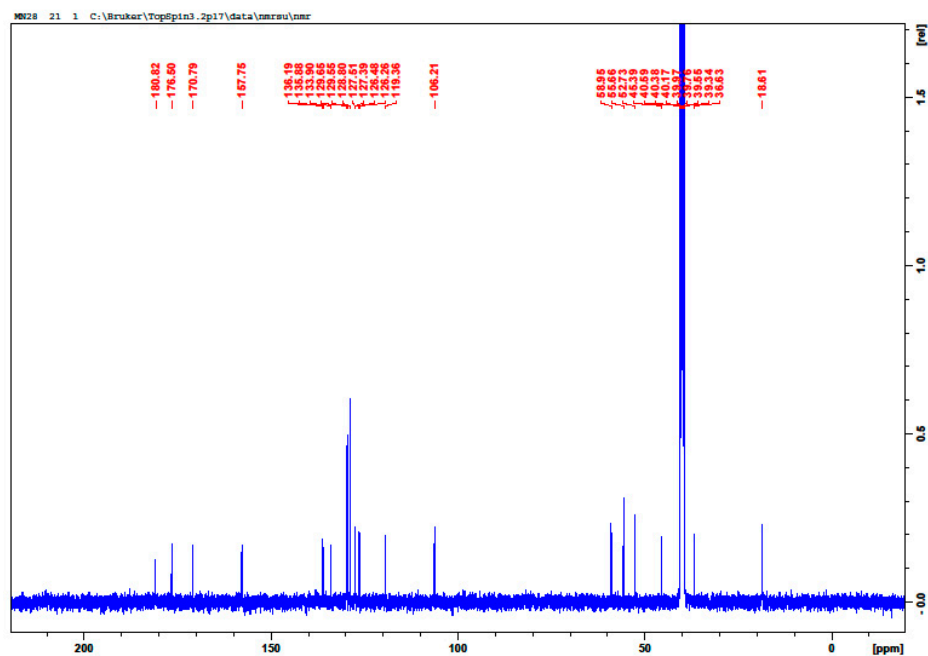

Figure S6.  $^1\text{H}$  NMR spectrum (a) and  $^{13}\text{C}$  NMR (b) of compound 13 (MN28).



a)

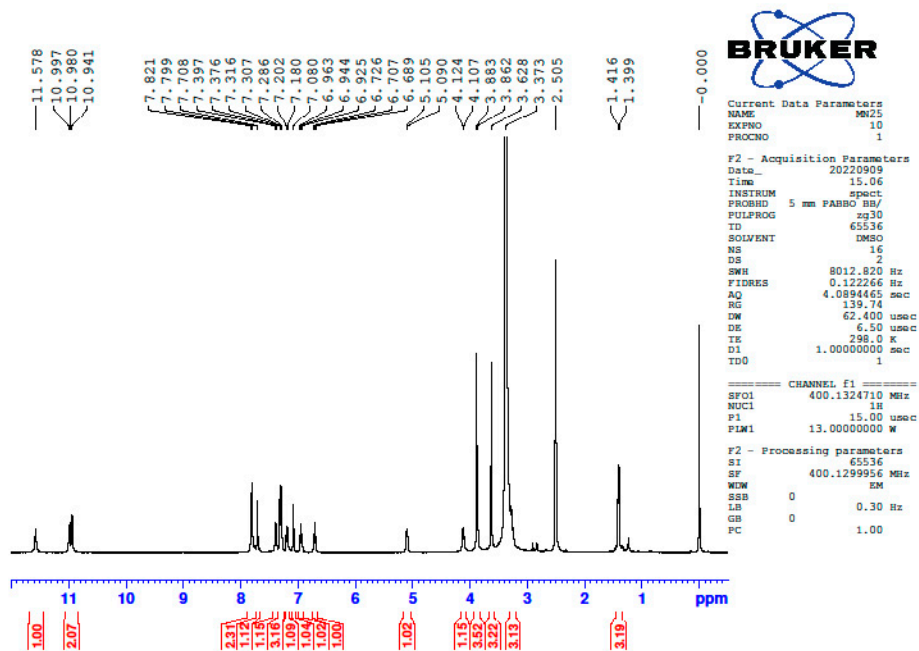

b)

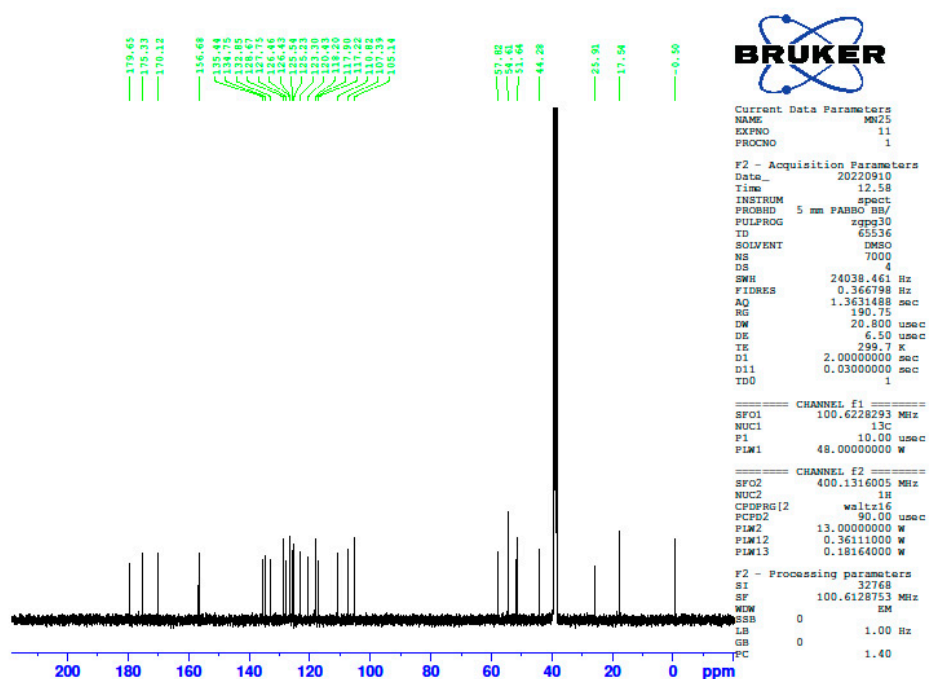

Figure S7.  $^1\text{H}$  NMR spectrum (a) and  $^{13}\text{C}$  NMR (b) of compound **14** (MN25).
